# Supplementary material for: Polypentenamer thermoplastic elastomers via copolymerization of cyclopentene and dicyclopentadiene
Source: Royal Society of Chemistry journal article supplement (doi:10.1039/d3lp00076a), 2023-01-01
Supplement: d3lp00076a1.pdf [file d3lp00076a1.pdf]

Supporting Information For:

# Polypentenamer thermoplastic elastomers via copolymerization of cyclopentene and dicyclopentadiene

Daniel W. Weller <sup>a</sup>, Robert Halbach <sup>b</sup>, Alexander V. Zabula <sup>b</sup>, Sarah J. Mattler, <sup>b</sup> Xiaodan Gu <sup>a\*</sup>,  
Carlos R. López-Barrón <sup>b\*</sup>

<sup>a</sup> School of Polymer Science and Engineering, The University of Southern Mississippi,  
Hattiesburg, Mississippi 39406, United States

<sup>b</sup> ExxonMobil Chemical Company, 5200 Bayway Drive, Baytown, Texas 77520, United States

\*Corresponding Authors: Email: [xiaodangu@usm.edu](mailto:xiaodangu@usm.edu), [carlos.r.lopez-barron@exxonmobil.com](mailto:carlos.r.lopez-barron@exxonmobil.com)

Keywords: polypentenamer, cyclopentene, dicyclopentadiene, copolymer, thermoplastic  
elastomer

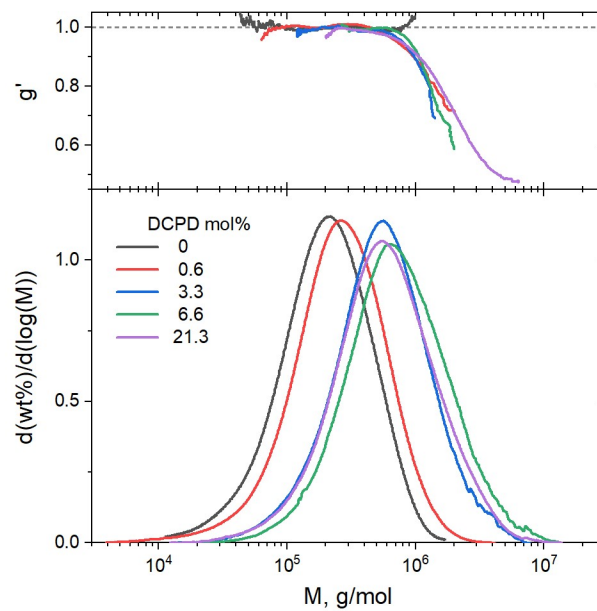

Figure S1: GPC data for the calculation of branching index (top) and molecular weight density (bottom) versus molecular weight ( $M$ ) for polymers of varying DCPD content.

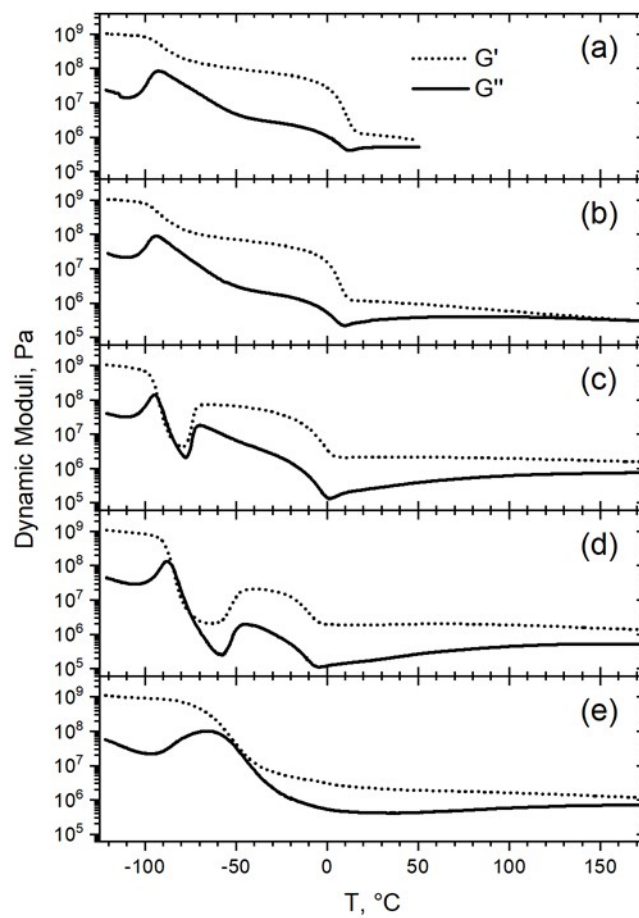

Figure S2: DMTA data showing storage and loss modulus at a heating ramp of 2  $^{\circ}\text{C}/\text{min}$  after fast quenching (60  $^{\circ}\text{C}/\text{min}$ ). Figure (a)~(e) represent the samples with DCPD mol% from 0, 0.6, 3.3, 6.6 and 21.3% respectively.

0% DCPD (-40 C)  
28.4% crystallinity

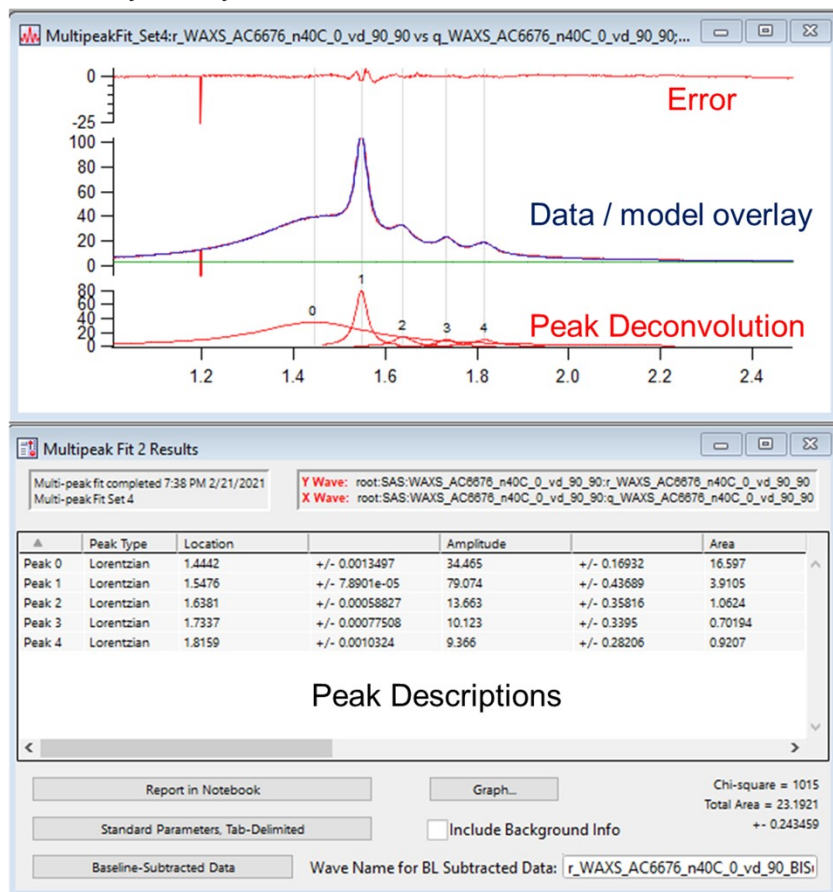

Figure S3: Example of Igor curve fitting software. (Top) Peak fitting results. Raw data neatly described as the combination of 1 amorphous peak (peak 0) and 4 crystalline peaks (peaks 1-4). (bottom) Peak descriptions used to calculate % crystallinity using following equation.

$$\% \text{ Crystallinity} = 100 \times \frac{\sum \text{Peak areas } 1,2,3,4}{\sum \text{Peak area } 0,1,2,3,4}$$

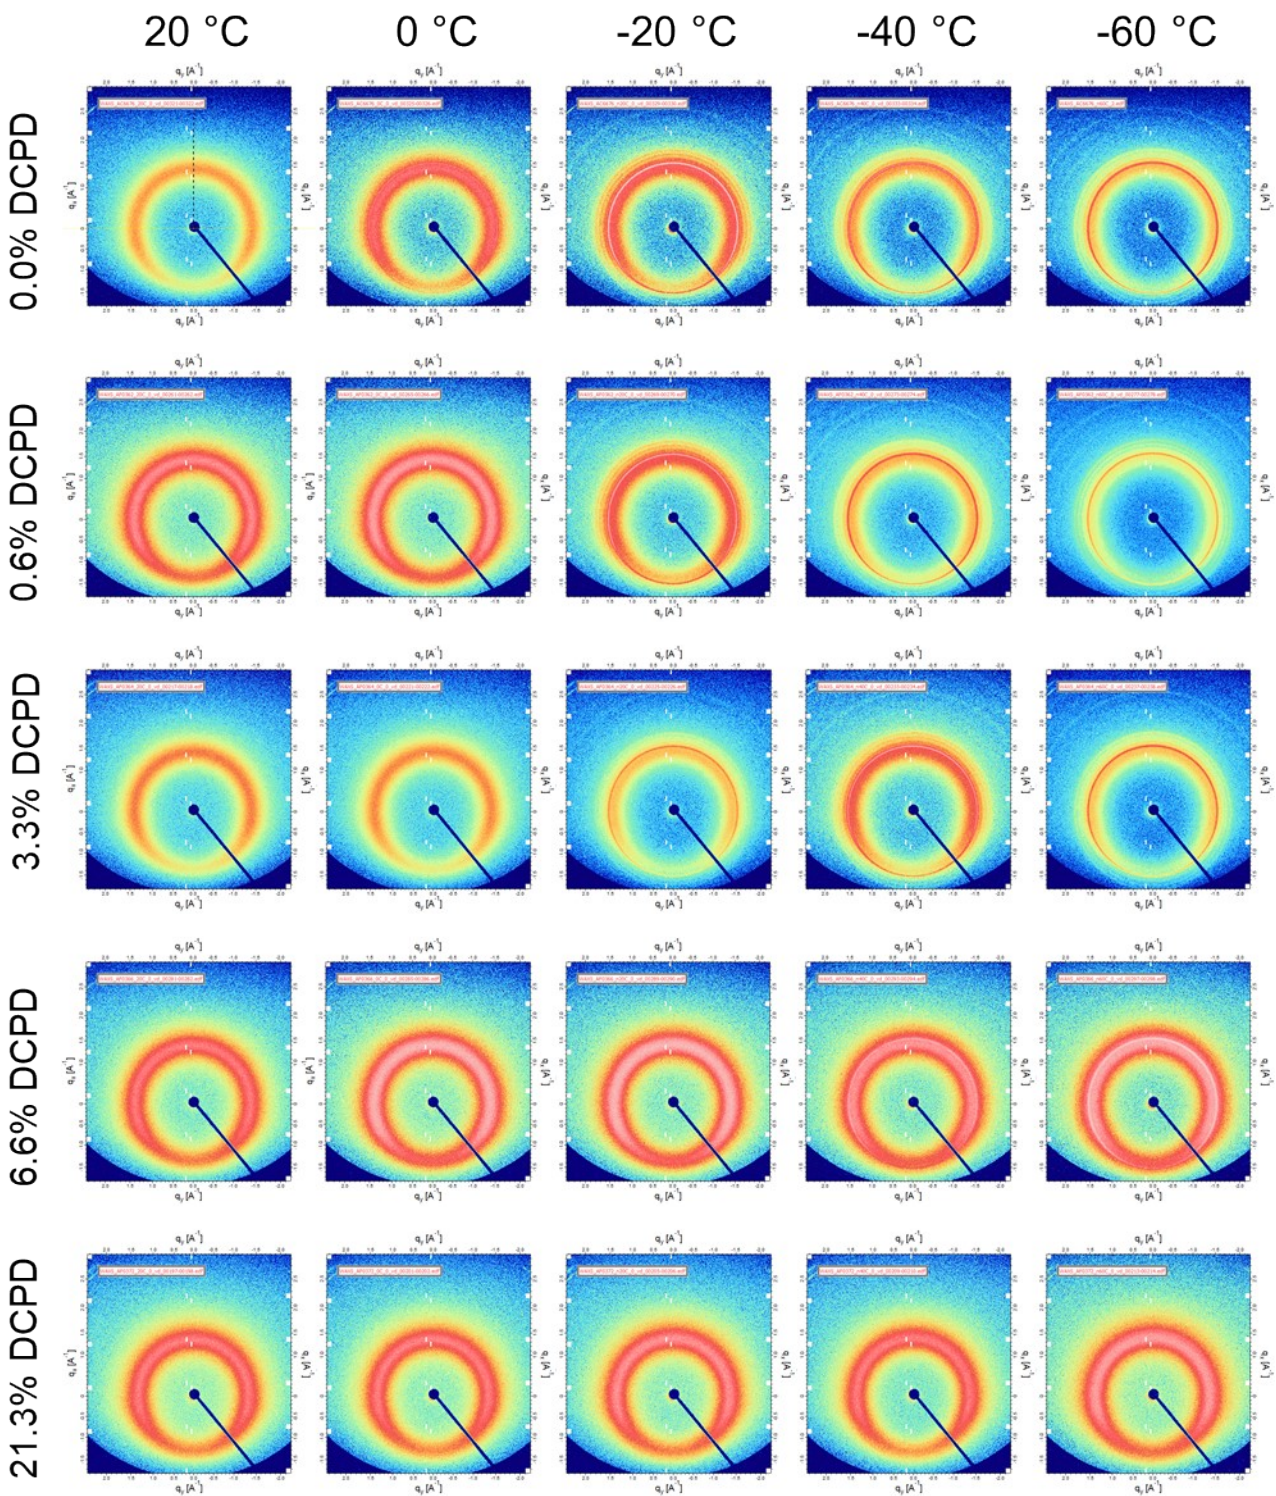

Figure S4: WAXS 2D images. Circular integration for 1D plots performed on the top half of data between 0 and 180 degrees to avoid the shadowing effect that reduced scattering intensity towards the bottom of the detector.



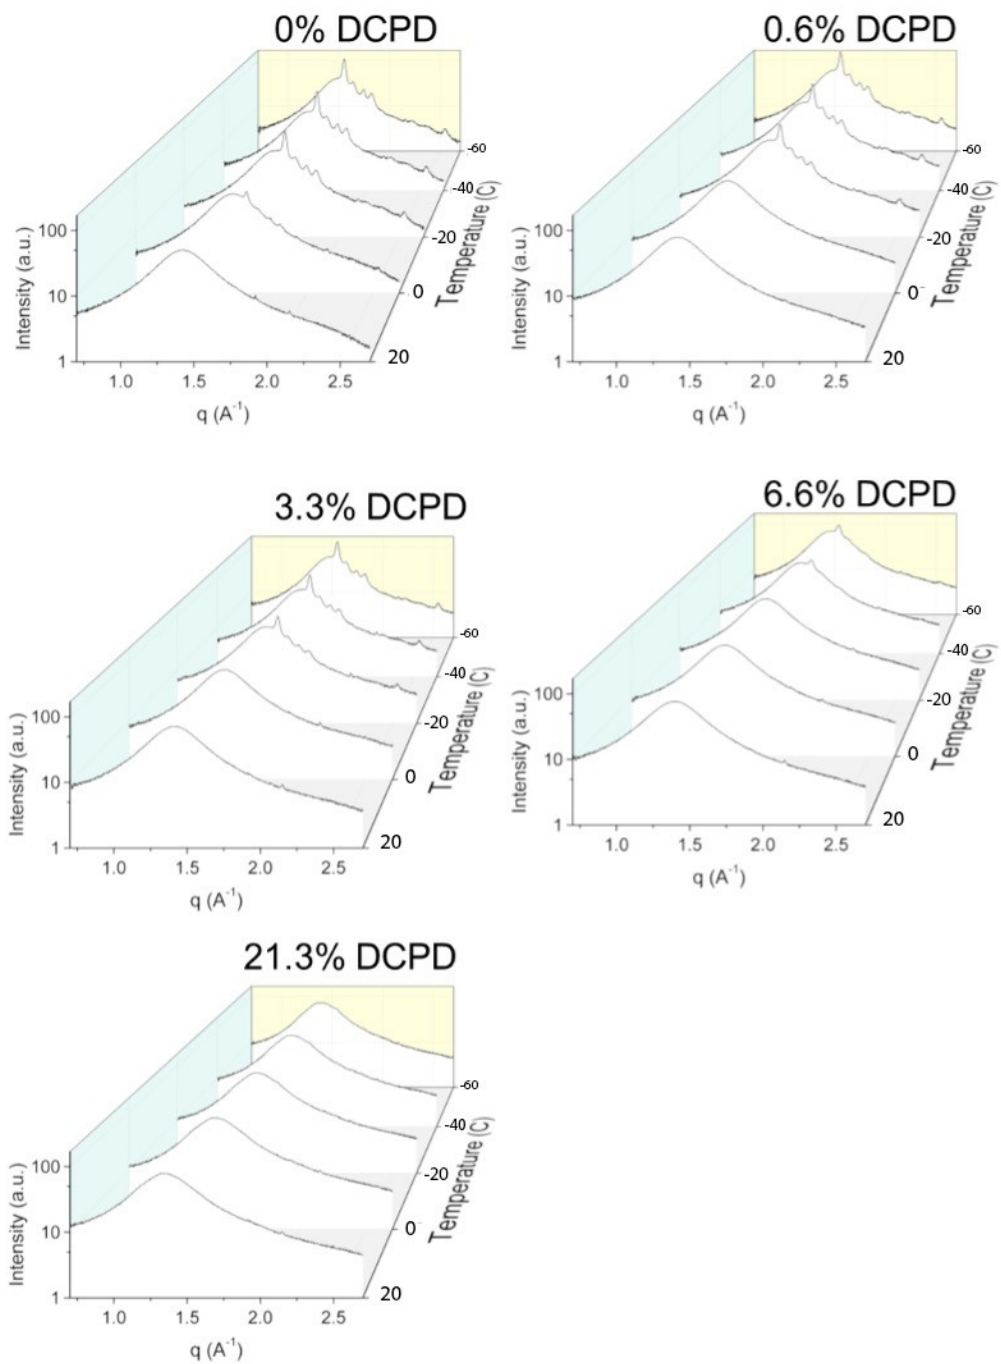

Figure S5: WAXS 1D Waterfall Plots for the polypentenamer with different DCPD content.

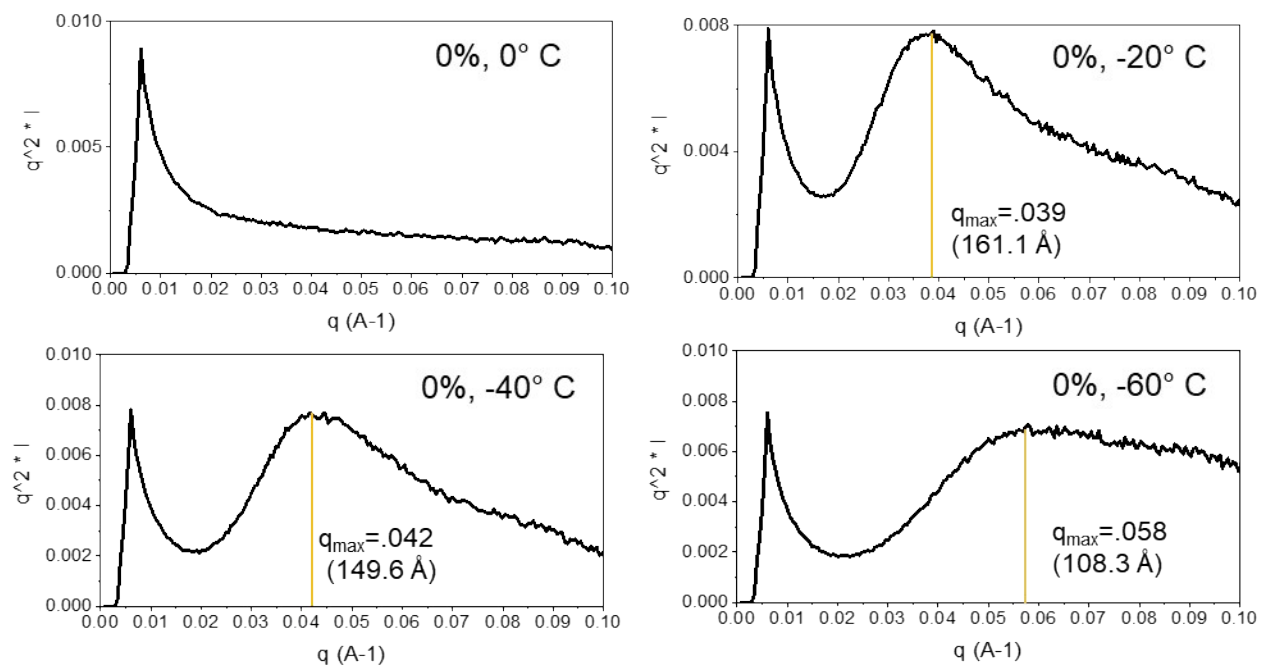

Figure S6: Kratkey plots of poly(pentenamer) containing 0% DCPD at various temperatures.

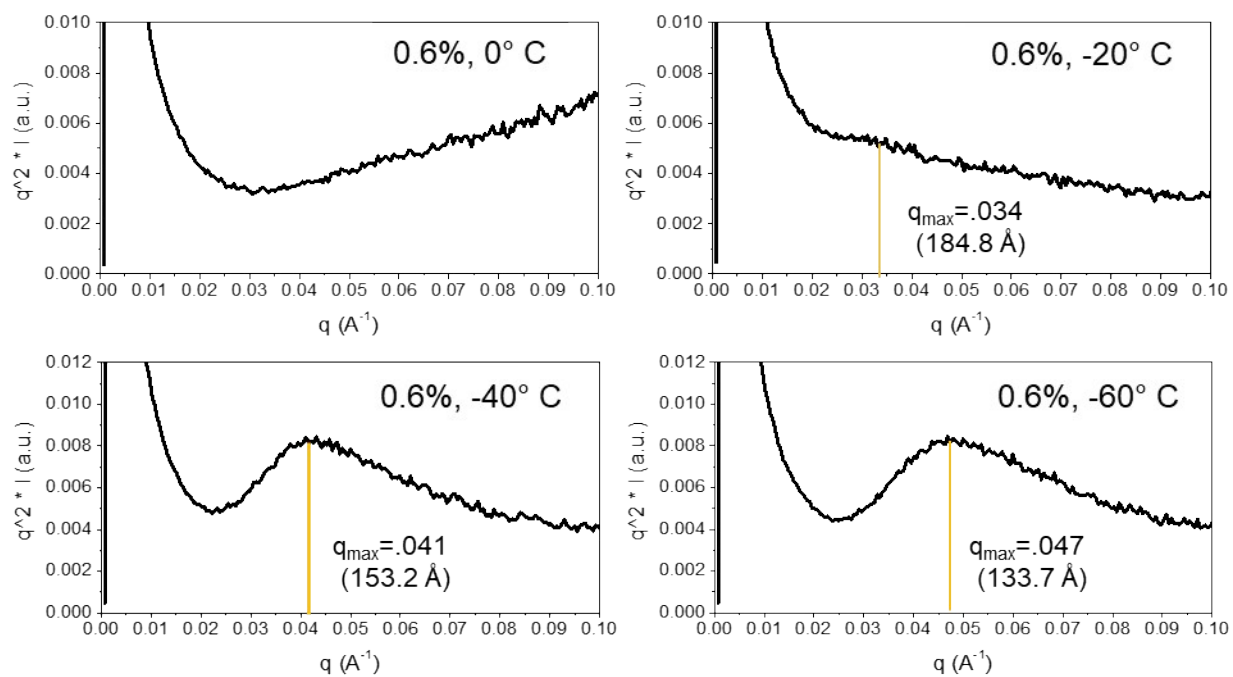

Figure S7: Kratkey plots of poly(pentenamer) containing 0.6% DCPD at various temperatures.

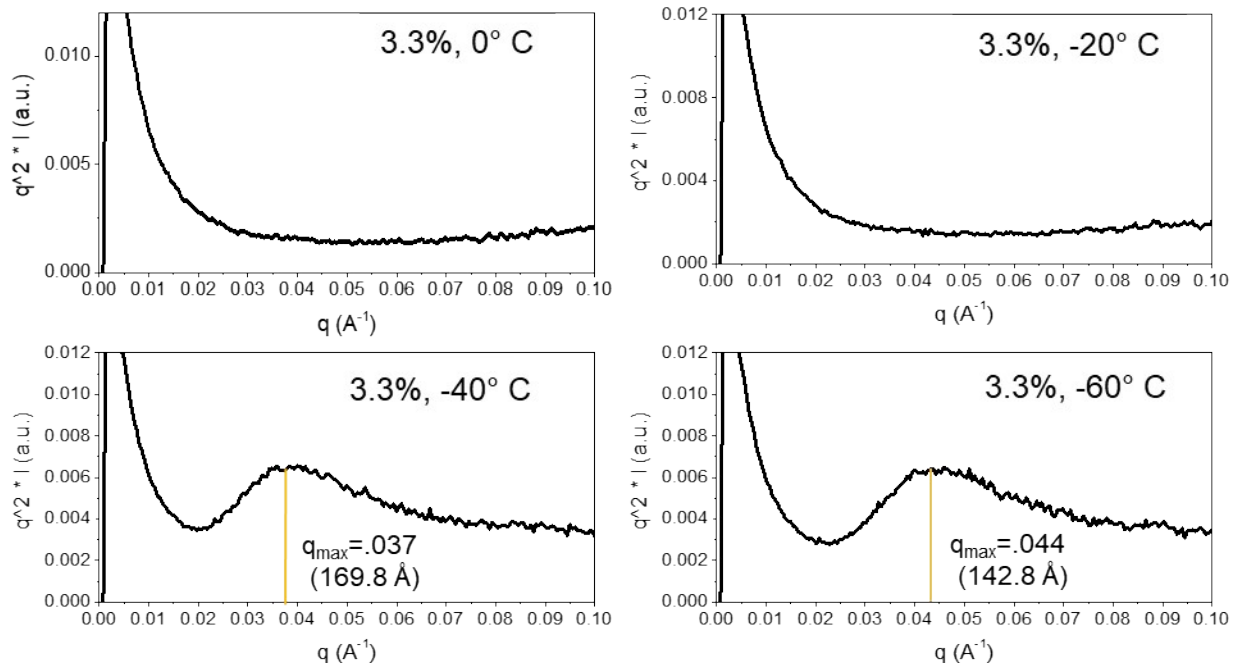

Figure S8: Kratkey plots of poly(pentenamer) containing 3.3% DCPD at various temperatures.

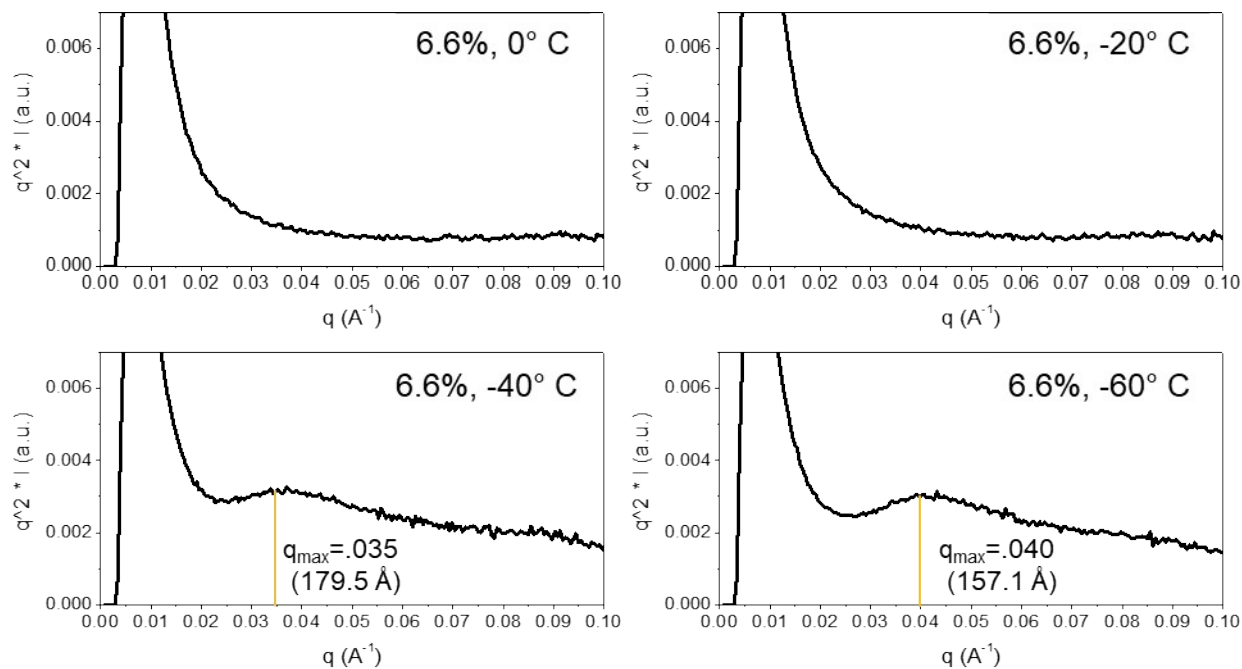

Figure S9: Kratkey plots of poly(pentenamer) containing 6.6% DCPD at various temperatures.



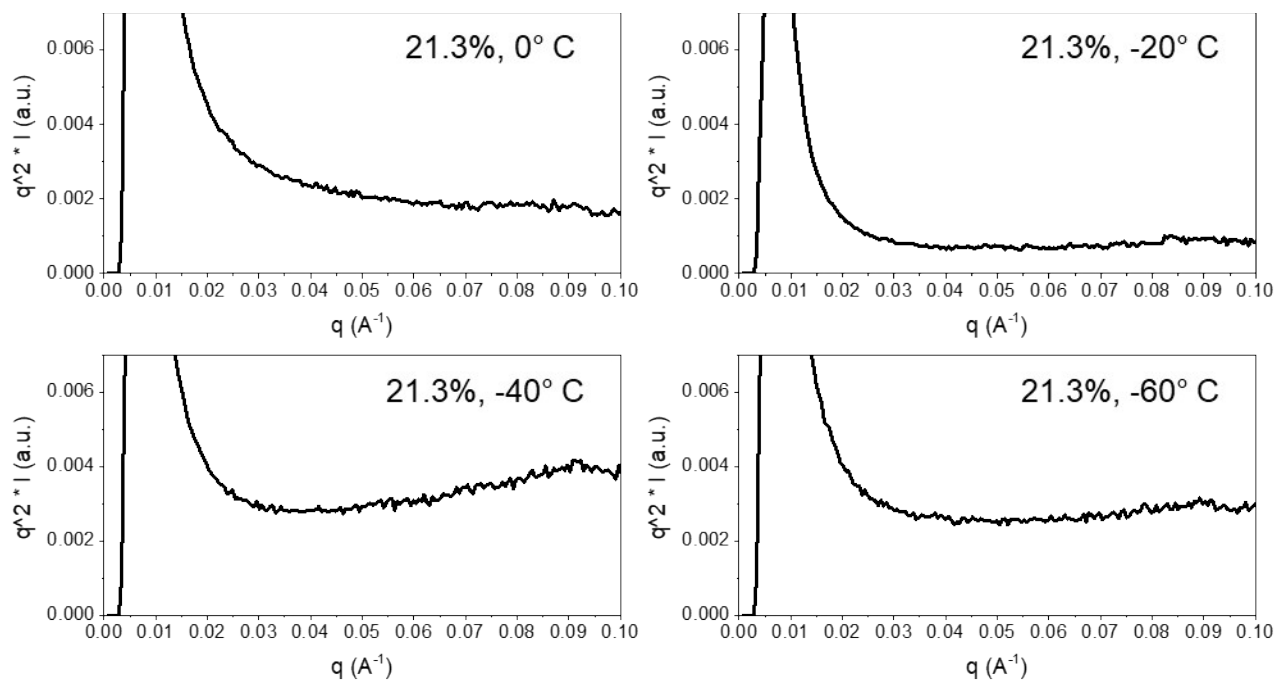

Figure S10: Kratkey plots of polypentenamer containing 21.3% DCPD at various temperatures.

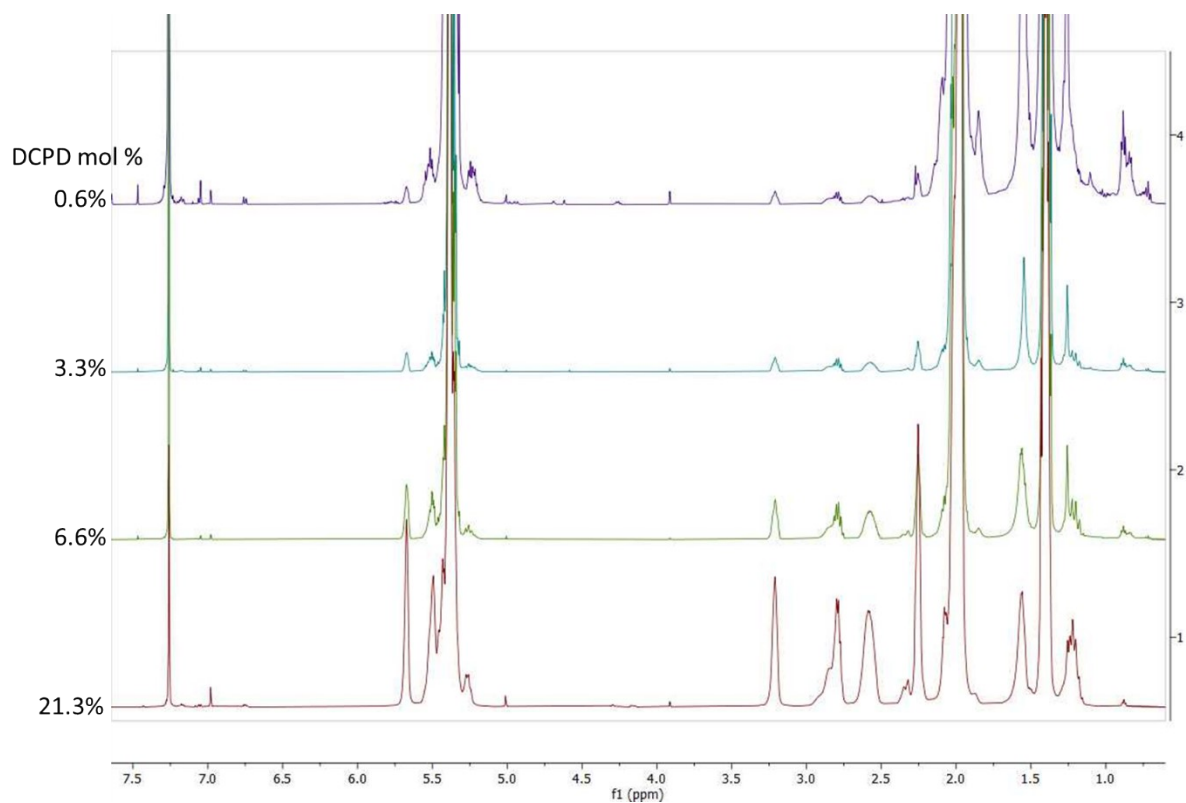

Figure S11:  $^1\text{H}$  NMR spectra for polypentenamer samples containing DCPD (in  $\text{CDCl}_3$ , 25 °C).

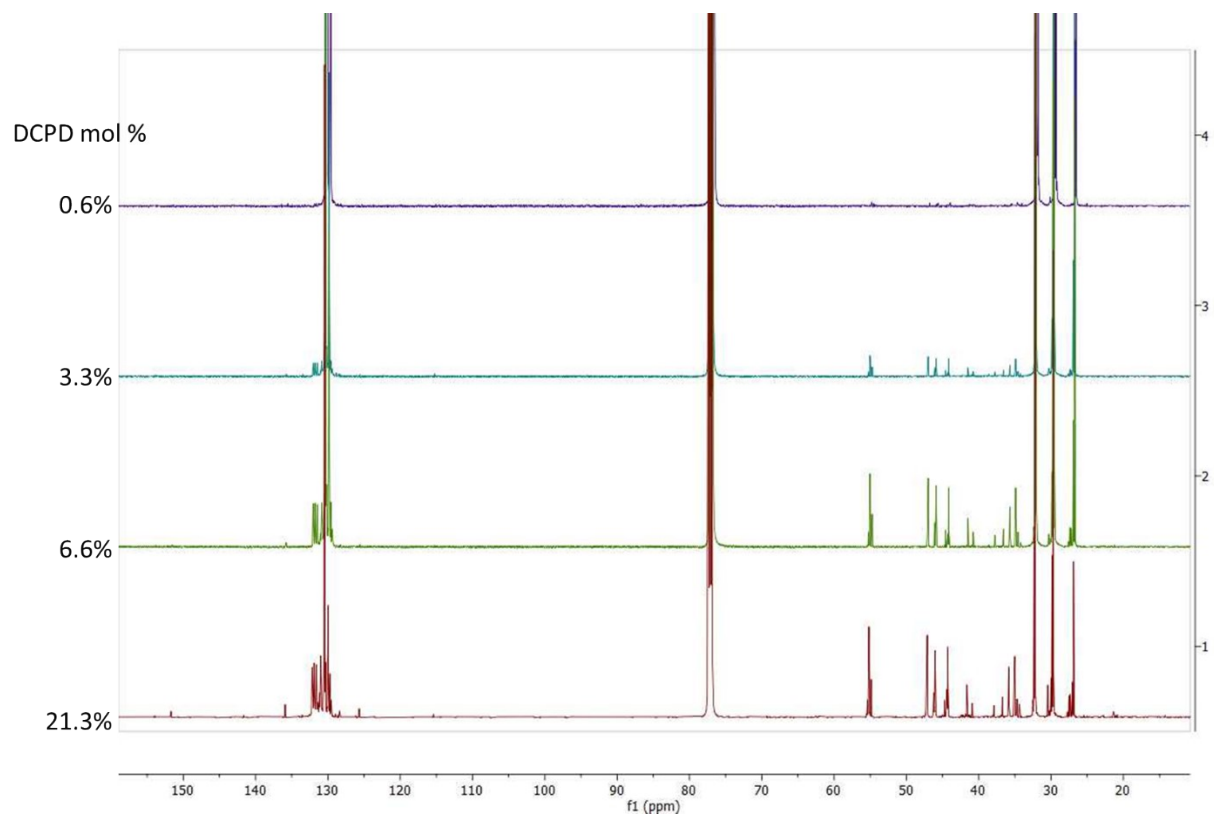

Figure S12:  $^{13}\text{C}$  NMR spectra for polypentenamer samples containing DCPD (in  $\text{CDCl}_3$ , 25 °C).

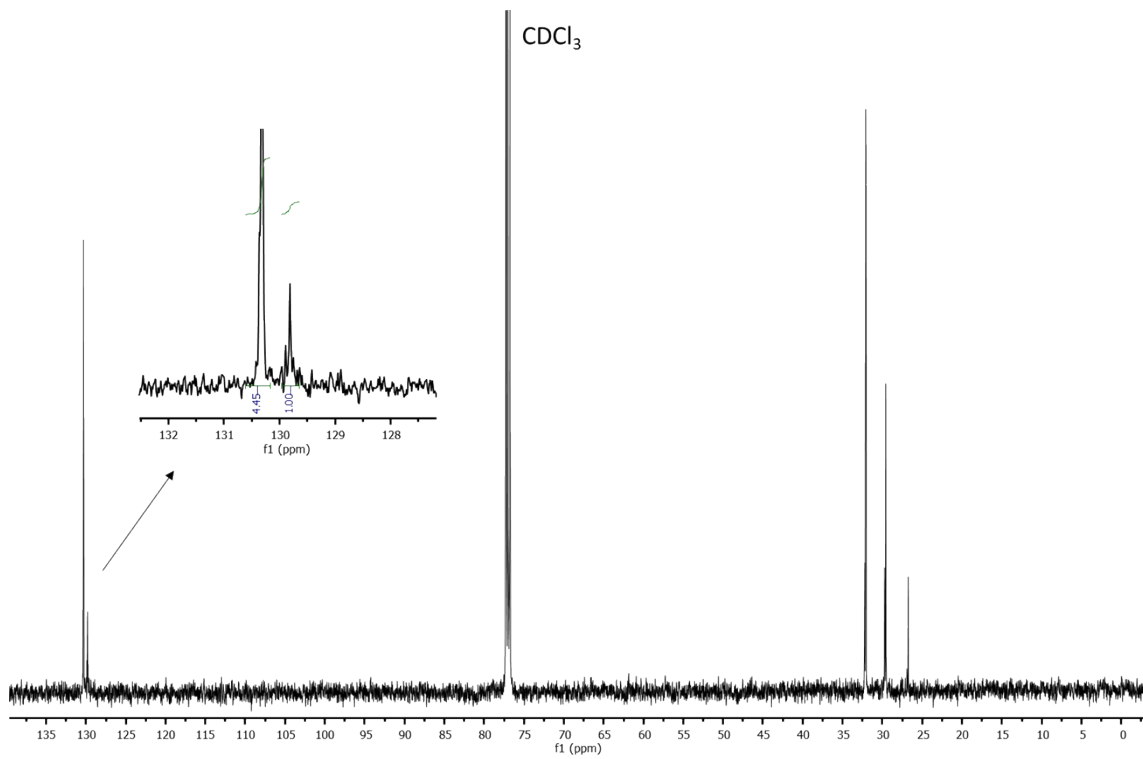

Figure S13:  $^{13}\text{C}$  NMR spectra for polypentenamer homopolymer (in  $\text{CDCl}_3$ , 25 °C).
